# Supplementary material for: Cognitive Trajectories in Older Patients with Cancer Undergoing Radiotherapy—A Prospective Observational Study
Source: MDPI journal article supplement (doi:10.3390/curroncol29070409), 2022-07-21
Supplement: s1 [file s1]

**Supplementary Table S1.** Spearman's rho correlation for factors included in the linear regression models.

[illegible]

**Supplementary Figure S1.** Second sensitivity analysis, growth mixture model including only patients who completed MoCA at all time points assessed, n=113.

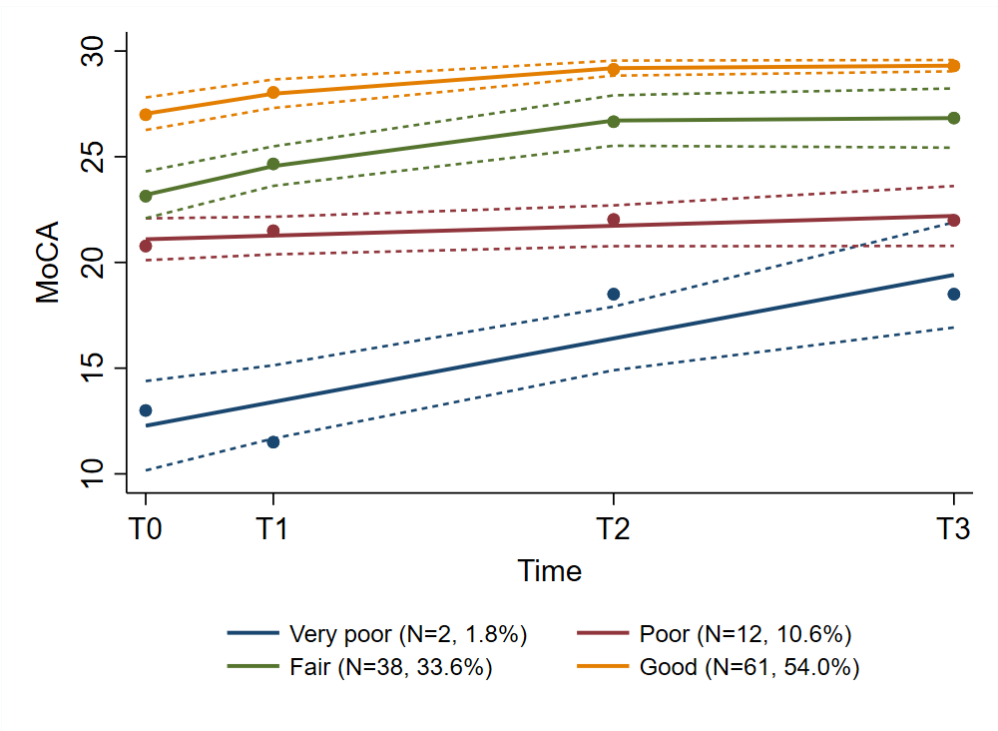

**Supplementary Table S2.** Results of growth mixture model, second sensitivity analysis only including patients who completed MoCA at all time points assessed.

|           | Very poor<br>N=2 <sup>a</sup> (1.8%) |         | Poor<br>N=12 (10.6%) |         | Fair<br>N=38 (33.6%) |         | Good<br>N=61 (54.0%) |         |
|-----------|--------------------------------------|---------|----------------------|---------|----------------------|---------|----------------------|---------|
|           | RC (SE)                              | p-value | RC (SE)              | p-value | RC (SE)              | p-value | RC (SE)              | p-value |
| Intercept | 12.28 (1.08)                         | <0.001  | 21.10 (0.50)         | <0.001  | 23.20 (0.56)         | <0.001  | 27.10 (0.29)         | <0.001  |
| Linear    | 0.38 (0.10)                          | <0.001  | 0.06 (0.04)          | 0.182   | 0.50 (0.10)          | <0.001  | 0.40 (0.08)          | <0.001  |
| Quadratic |                                      |         |                      |         | -0.02 (0.005)        | 0.002   | -0.01 (0.004)        | 0.002   |
| Av.prob.  | 0.99                                 |         | 0.92                 |         | 0.86                 |         | 96                   |         |

Abbreviations: RC, regression coefficient; SE, standard error; T0, baseline; T1, at RT completion; T2, 8 weeks after RT; T3, 16 weeks after RT. Av.prob, average group-probability. <sup>a</sup>The very poor group contains only two patients, but none of the applied statistical criteria (except for reasonable group size) suggests that this group could be merged with another one.
